# Supplementary material for: Simultaneous Determination of Four DNA bases at Graphene Oxide/Multi-Walled Carbon Nanotube Nanocomposite-Modified Electrode
Source: PubMed Central journal article supplement (PMC7143941; doi:10.3390/mi11030294), 2020-03-11
Supplement: micromachines-11-00294-s001.pdf [file micromachines-11-00294-s001.pdf]

Supplementary Material

# Simultaneous Determination of Four DNA bases at Graphene Oxide/Multi-walled Carbon Nanotube Nanocomposite-modified Electrode

Shuting Wang <sup>1,†</sup>, Celia Ferrag <sup>1,2,†</sup>, Meissam Noroozifar <sup>1</sup> and Kagan Kerman <sup>1,2,\*</sup>

<sup>1</sup> Department of Physical and Environmental Sciences, University of Toronto Scarborough, 1265 Military Trail, Toronto, ON M1C 1A4, Canada; shuting.wang@mail.utoronto.ca (S.W.); celia.ferrag@mail.utoronto.ca (C.F.); m.noroozifar@utoronto.ca (M.N.)

<sup>2</sup> Department of Chemistry, University of Toronto, 80 St. George Street, Toronto, ON M5S 3H6, Canada

\* Correspondence: kagan.kerman@utoronto.ca

† These authors contributed equally to the work

**Table S1.** A summary of calculated diffusion coefficients, catalytic rate constants and heterogeneous kinetic rate constant ( $K_h$ ) for UA, G, A, T and C using the designated electrode.

| Analyte | $E_p$ (V) | $E_{p1/2}$ (V) | $D_0$ (cm $\cdot$ s $^{-1}$ ) | $K_s$ (mol $^2$ s $^{-1}$ ) | $K_h$ (M $^{-1}$ s $^{-1}$ ) |
|---------|-----------|----------------|-------------------------------|-----------------------------|------------------------------|
| UA      | 0.291     | 0.252          | $1.27 \times 10^{-6}$         | $2.00 \times 10^{-3}$       | $1.45 \times 10^3$           |
| G       | 0.689     | 0.284          | $6.91 \times 10^{-5}$         | $4.58 \times 10^{-3}$       | $3.31 \times 10^4$           |
| A       | 0.975     | 0.298          | $7.40 \times 10^{-6}$         | $1.16 \times 10^{-3}$       | $7.24 \times 10^4$           |
| T       | 1.148     | 0.701          | $4.57 \times 10^{-4}$         | $1.12 \times 10^{-2}$       | $1.39 \times 10^2$           |
| C       | 1.314     | 1.045          | $1.49 \times 10^{-5}$         | $2.61 \times 10^{-3}$       | $1.11 \times 10^2$           |

**Table S2.** Comparison table of classical methods for DNA detection and the proposed electrochemical method.

| Method                 | Linear range ( $\mu$ M) | LOD ( $\mu$ M) | Conditions                                                                                                                       | Time   | Ref       |
|------------------------|-------------------------|----------------|----------------------------------------------------------------------------------------------------------------------------------|--------|-----------|
| GC-FID                 | A 0.5-50                | 0.08           | Carrier gas: He; initial column temperature set 100 °C for 1 min, followed by rising to 280 °C at 30 °C min $^{-1}$ up to 280 °C | 9 min  | [44]      |
|                        | G 0.5-50                | 0.09           |                                                                                                                                  |        |           |
|                        | T 0.5-50                | 0.10           |                                                                                                                                  |        |           |
|                        | C 0.5-50                | 0.10           |                                                                                                                                  |        |           |
| HPLC-DAD               | G 0.728-72.79           | 0.220          | mobile phase: acetonitrile (A) and water (B)                                                                                     | 50 min | [45]      |
|                        | T 4.758-475.76          | 0.260          |                                                                                                                                  |        |           |
| HPLC - UV              | A 1.11-111.0            | 0.903          | mobile phase: 0.01 mol/L potassium dihydrogen phosphate aqueous solution (A) and methanol (B)                                    | 60 min | [46]      |
|                        | G 0.993-101.3           | 0.820          |                                                                                                                                  |        |           |
|                        | T 1.19-119.6            | 0.484          |                                                                                                                                  |        |           |
|                        | C 1.35-136.4            | 0.270          |                                                                                                                                  |        |           |
| Electrochemical Sensor | A 2-119.5               | 0.430          | Electrolyte: Phosphate buffer (pH =7.0), Method: DPV                                                                             | 4 min  | This work |
|                        | G 1-78                  | 0.110          |                                                                                                                                  |        |           |
|                        | T 12.5-227.5            | 1.710          |                                                                                                                                  |        |           |
|                        | C 5-132.5               | 0.800          |                                                                                                                                  |        |           |

44. Brohi, R.O.Z.Z.; Khuhawar, M.Y.; Khuhawar, T.M.J. GC-FID determination of nucleobases guanine, adenine, cytosine, and thymine from DNA by precolumn derivatization with isobutyl chloroformate. *J. Anal. Sci. Technol.* **2016**, *7*, 0–5.
45. Duan, B.; Wang, L.; Dai, X.; Huang, L.; Yang, M.; Chen, S. Identification and quantitative analysis of nucleosides and nucleobases in aqueous extracts of *Fritillaria cirrhosa* D. DON. using HPLC-DAD and HPLC-ESI-MS. *Anal. Lett.* **2011**, *44*, 2491–2502.
46. Cheng, W.; Zhang, X.; Song, Q.; Lu, W.; Wu, T.; Zhang, Q.; Li, C. Determination and comparative analysis of 13 nucleosides and nucleobases in natural fruiting body of *Ophiocordyceps sinensis* and its substitutes. *Mycology* **2017**, *8*, 318–326.

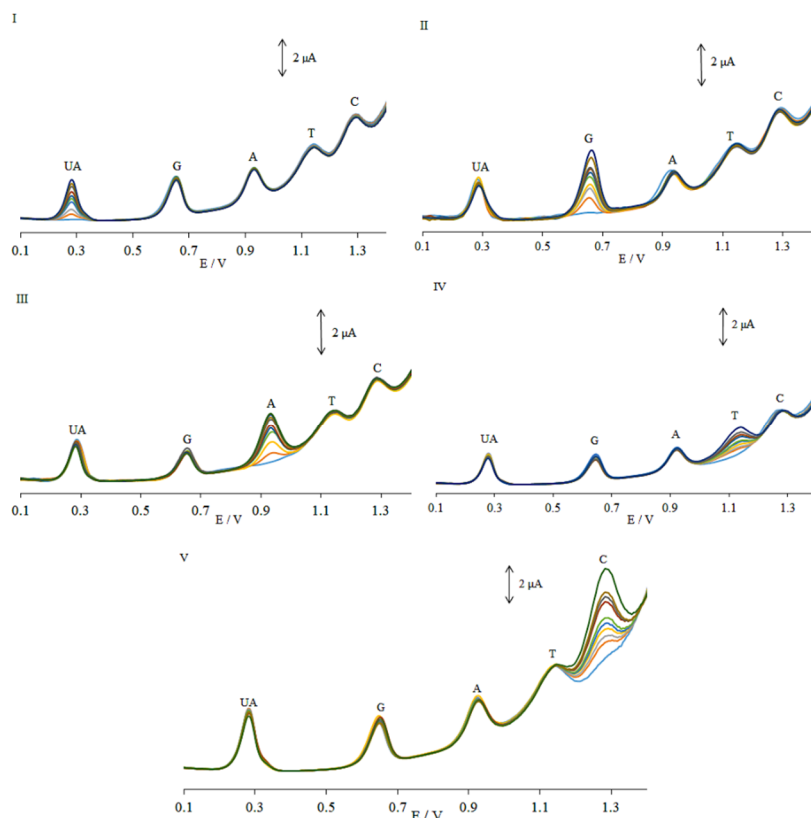

**Figure S1.** Differential pulse voltammograms of GCE/MWCNT-GO-CHT for interference studies: **I)** The concentrations of G, A, T and C were kept constant at 10.5  $\mu\text{M}$ , 12.5  $\mu\text{M}$ , 147.5  $\mu\text{M}$  and 97.5  $\mu\text{M}$ , respectively, while varying the concentrations of UA from 0 to 37.5  $\mu\text{M}$ ; **II)** The concentrations of UA, A, T and C were kept constant at 30  $\mu\text{M}$ , 32.5  $\mu\text{M}$ , 147.5  $\mu\text{M}$  and 97.5  $\mu\text{M}$ , respectively, while varying the concentrations of G from 0 to 28  $\mu\text{M}$ ; **III)** The concentrations of UA, G, T and C were kept constant at 30  $\mu\text{M}$ , 10.5  $\mu\text{M}$ , 147.5  $\mu\text{M}$  and 97.5  $\mu\text{M}$ , respectively, while varying the concentrations of A from 0 to 32.5  $\mu\text{M}$ ; **IV)** The concentrations of UA, G, A and C were kept constant at 30  $\mu\text{M}$ , 10.5  $\mu\text{M}$ , 12.5  $\mu\text{M}$  and 97.5  $\mu\text{M}$ , respectively, while varying the concentrations of T from 0 to 247.5  $\mu\text{M}$ ; **V)** The concentrations of UA, G, A and T were kept constant at 30  $\mu\text{M}$ , 32.5  $\mu\text{M}$ , 147.5  $\mu\text{M}$  and 97.5  $\mu\text{M}$ , respectively, while varying the concentrations of C from 0 to 28  $\mu\text{M}$ .

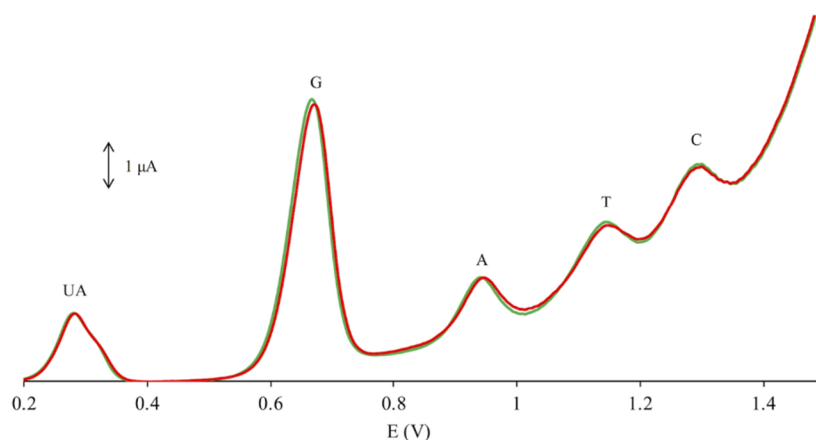

**Figure S2.** DPV of simultaneous detection of 30, 57.5, 12.5, 147.5 and 97.5  $\mu\text{M}$  of UA, G, A, T and C, respectively, using freshly prepared (0 days) electrode (red line) and stored (14 days at room temperature) electrode (green line).

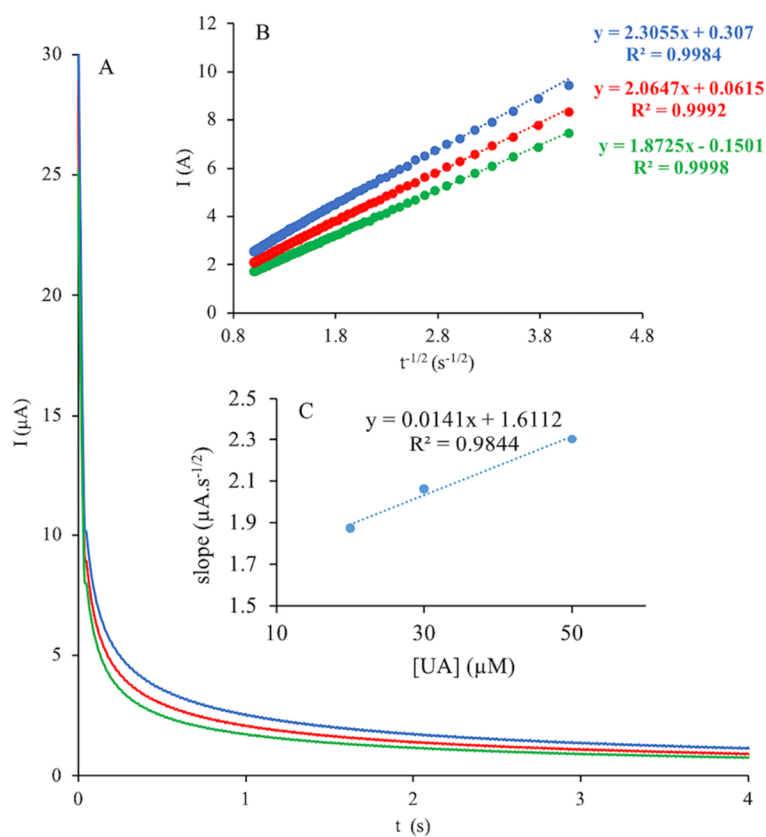

**Figure S3.** (A) Chronoamperograms of GCE/GO-MWCNT-CHT for varying concentrations of UA: 20, 30, 50  $\mu\text{M}$  in 0.2 M PBS (pH 7.0); (B) Plots of anodic peak currents ( $I_{pa}$ ) vs.  $t^{-1/2}$ ; (C) Plot of the slope of straight line vs. UA concentration.

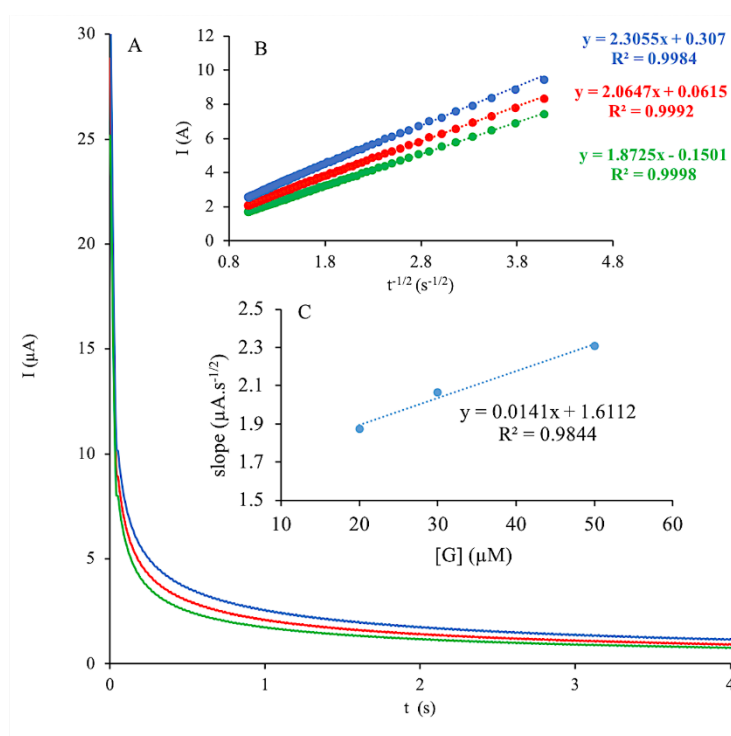

**Figure S4.** (A) Chronoamperograms of GCE/GO-MWCNT-CHT for varying concentrations of G: 10, 20, 30  $\mu\text{M}$  in 0.2 M PBS (pH 7.0); (B) Plots of anodic peak currents ( $I_{pa}$ ) vs.  $t^{-1/2}$ ; (C) Plot of the slope of straight line vs. G concentration.

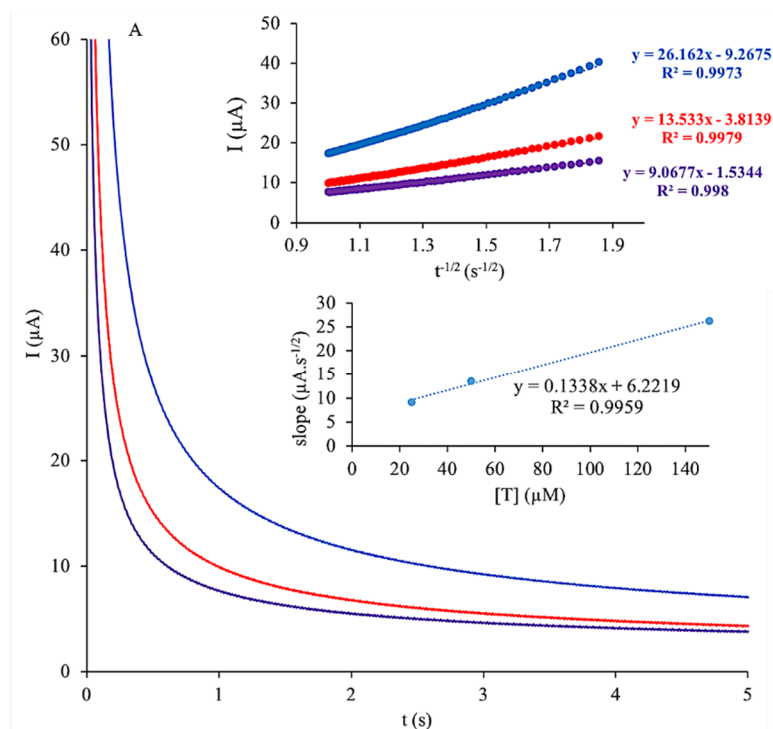

**Figure S5.** (A) Chronoamperograms of GCE/GO-MWCNT-CHT for varying concentrations of T: 25, 50, 150  $\mu\text{M}$  in 0.2 M PBS (pH 7.0); (B) Plots of anodic peak currents ( $I_{\text{pa}}$ ) vs.  $t^{-1/2}$ ; (C) Plot of the slope of straight line vs. T concentration.

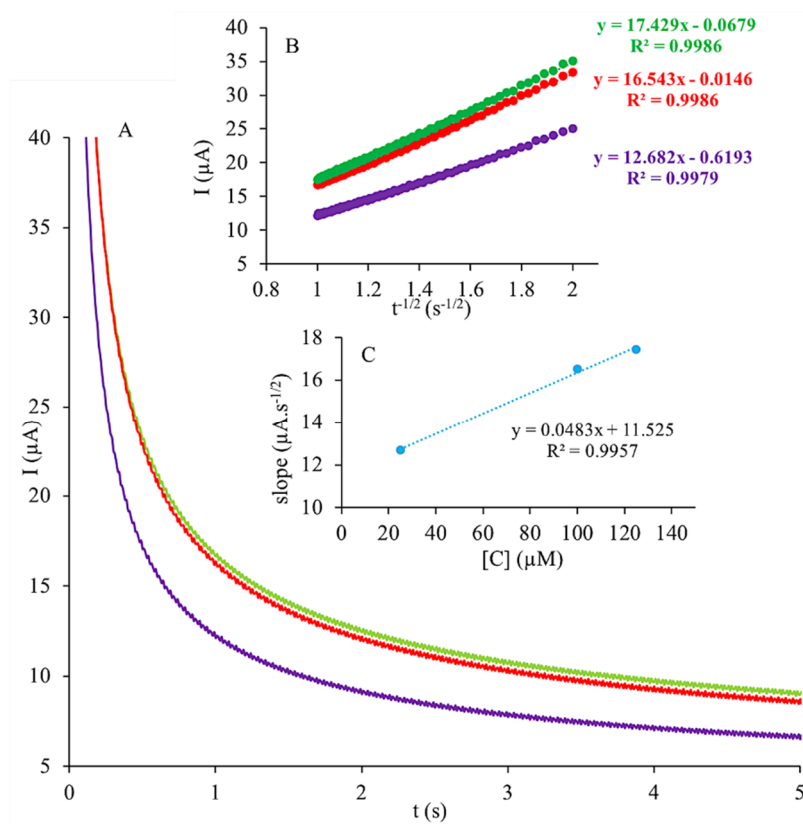

**Figure S6.** (A) Chronoamperograms of GCE/GO-MWCNT-CHT for varying concentrations of C: 25, 100, 125  $\mu\text{M}$  in 0.2 M PBS (pH 7.0); (B) Plots of anodic peak currents ( $I_{\text{pa}}$ ) vs.  $t^{-1/2}$ ; (C) Plot of the slope of straight line vs. C concentration.

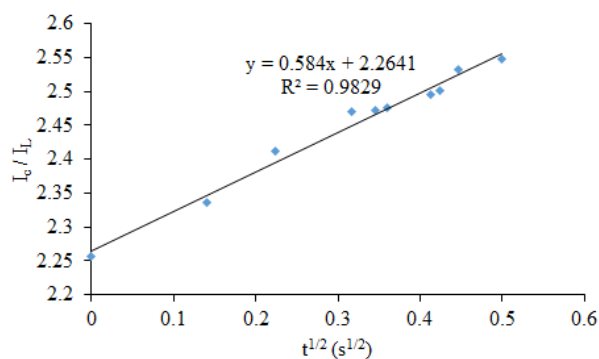

**Figure S7.** Linear dependence of square root of time on  $I_c/I_L$  for UA detection using chronoamperometry.

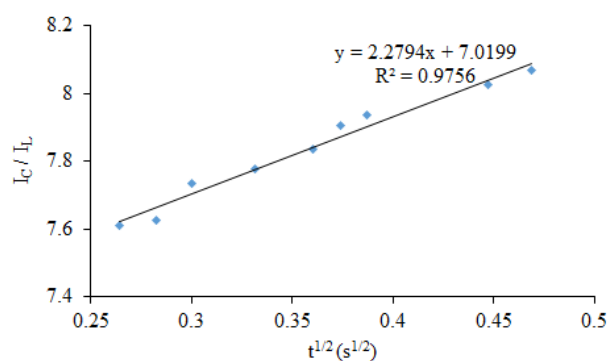

**Figure S8.** Linear dependence of square root of time on  $I_c/I_L$  for G detection using chronoamperometry.

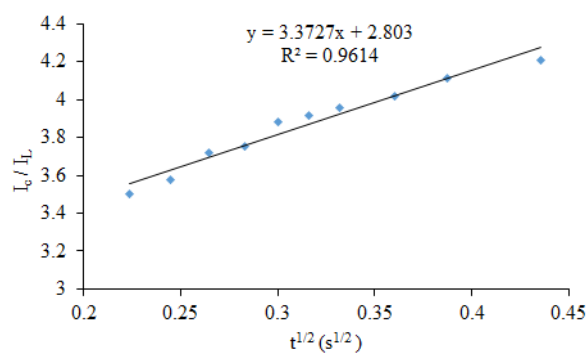

**Figure S9.** Linear dependence of square root of time on  $I_c/I_L$  for A detection using chronoamperometry.

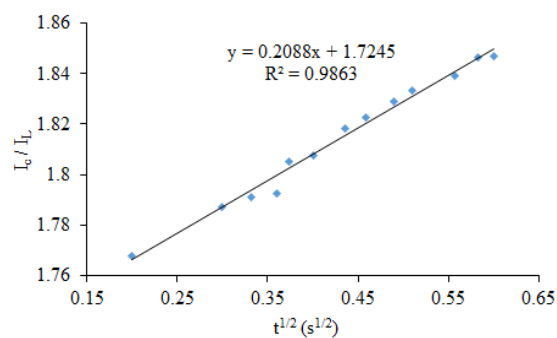

**Figure S10.** Linear dependence of square root of time on  $I_c/I_L$  for T detection using chronoamperometry.

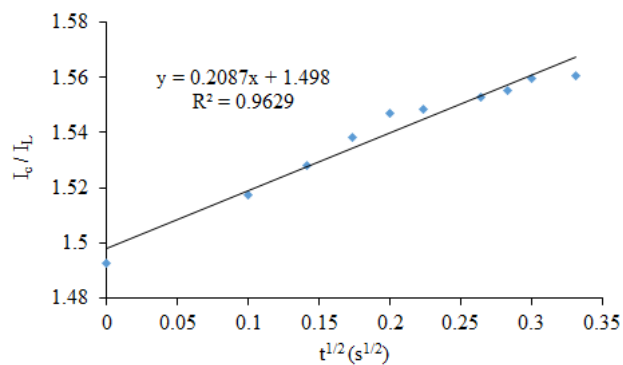

**Figure S11.** Linear dependence of square root of time on  $I_c/I_a$  for C detection using chronoamperometry.

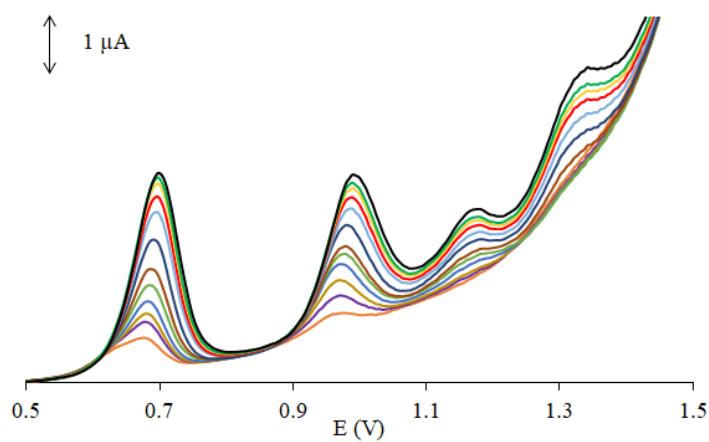

**Figure S12.** DPV for standard addition in human serum sample that was diluted 10-fold in 0.2 M PBS (pH 7.0).

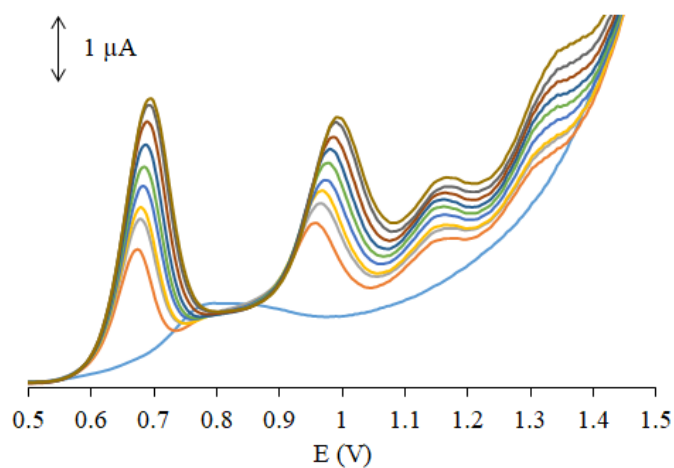

**Figure S13.** DPV for standard addition in human saliva sample that was diluted 5-fold in 0.2 M PBS (pH 7.0).

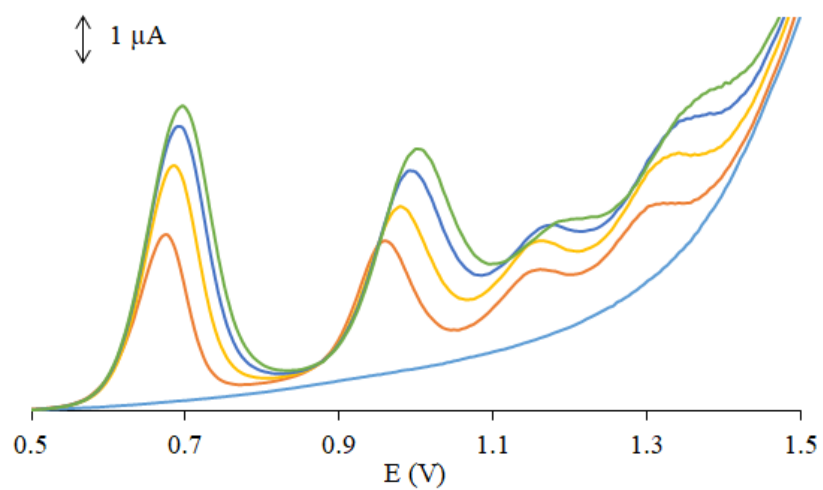

**Figure S14.** DPV for standard addition in artificial saliva sample that was diluted 5-fold in 0.2 M PBS (pH 7.0).
